# Supplementary material for: Toward efficient perovskite solar cells by planar imprint for improved perovskite film quality and granted bifunctional barrier
Source: Royal Society of Chemistry journal article supplement (doi:10.1039/d1ta04520b), 2021-01-01
Supplement: d1ta04520b1.pdf [file d1ta04520b1.pdf]

## Supporting Information

### **Toward Efficient Perovskite Solar Cells by Planar Imprint for Improved Perovskite Film Quality and Granted Bifunctional Barrier**

*Lu Huang<sup>a,b</sup>, Zhi Xing<sup>a,b</sup>, Xianglan Tang<sup>a,b</sup>, Dengxue Li,<sup>b,c</sup> Xiangchuan Meng<sup>a,b</sup>, Xiaotian Hu<sup>a,b</sup>, Ting Hu<sup>b,c\*</sup>, and Yiwang Chen<sup>a,b,d\*</sup>*

<sup>a</sup> College of Chemistry, Nanchang University, 999 Xuefu Avenue, Nanchang 330031, China.

<sup>b</sup> Institute of Polymers and Energy Chemistry, Nanchang University, 999 Xuefu Avenue, Nanchang 330031, China.

<sup>c</sup> School of Materials Science and Engineering, Nanchang University, 999 Xuefu Avenue, Nanchang 330031, China.

<sup>d</sup> Institute of Advanced Scientific Research (iASR), Jiangxi Normal University, 99 Ziyang Avenue, Nanchang 330022, China.

#### **EXPERIMENTAL SECTION**

**Material:** N, N-dimethylformamide (DMF, 99.8% purity), dimethyl sulfoxide (DMSO, 99.9% purity), acetonitrile (99.8% purity), chlorobenzene (CB, 99.8% purity), 4-tert-butyl pyridine (tBP) and CH<sub>3</sub>NH<sub>3</sub>I (MAI, >98% purity) were purchased from Sigma-Aldrich and used as received without further purification. Lead iodide (PbI<sub>2</sub>, 99.9985% purity), tin(IV) oxide (15% in H<sub>2</sub>O colloidal dispersion liquid), lithium bis(trifluoromethylsulfonyl) imide (Li-TFSI, >98% purity) and were purchased from Alfa Aesar. Trimethoxy (1H,1H,2H,2H-heptadecafluorodecyl) silane (FAS, 98% purity) was purchased from Innochem. 2,2',7,7'-Tetrakis [N, N -di(4-methoxyphenyl) amino]-9,9'-spirobifluorene (spiro-MeOTAD, 99% purity) was purchased from Luminescence Technology Crop.

**Preparation of Solution and Anti-sticking layer:** The tin(IV) oxide solution was prepared in a ratio of 1:3. The perovskite solution was prepared by 922 mg of  $\text{PbI}_2$ , 318 mg of MAI, 1270  $\mu\text{L}$  DMF and 142  $\mu\text{L}$  DMSO. The spiro-MeOTAD solution was prepared by dissolving 72.3 mg of spiro-MeOTAD, 28.8  $\mu\text{L}$  of TBP and 17.5  $\mu\text{L}$  of Li-TFSI solution (520 mg Li-TFSI in 1 mL acetonitrile) in 1 mL of CB. Finally, FAS was deposited on top of Si stamp by evaporation in high vacuum for 3 hours.

**Fabrication of Devices:** The indium tin oxide (ITO) glass was cleaned with acetone, detergent, distilled water and isopropanol for 20 min, respectively.  $\text{SnO}_2$  was spin-coated on the ITO glass at 3000 rpm for 30 s, annealing at  $150^\circ\text{C}$  for 30 min. Then the perovskite solution was deposited on the  $\text{SnO}_2$  surface at 4000 rpm for 30 s in  $\text{N}_2$  atmosphere and dried  $100^\circ\text{C}$ . Simultaneously, 150  $\mu\text{L}$  CB solution was drop-casted fastly in seven seconds. At a pressure of 3 MPa and a preset temperature ( $100^\circ\text{C}$ ,  $150^\circ\text{C}$  and  $180^\circ\text{C}$ ), the perovskite film is placed on the silicon wafer for planar imprint (PiP) for 10 min in air. Finally, the hole transporting layer spiro-MeOTAD solution was spin-coated on top at 4000 rpm for 30 s. Finally, 100 nm Ag was deposited on top by evaporation in high vacuum.

**Characterization:** FTIR spectra were recorded on a Shimadzu IRPrestige-21 spectrometer. X-ray photoelectron spectroscopy (XPS) was performed in an ESCALAB 250Xi, Thermo Fisher (by using Al  $K\alpha$  X-ray source) under high vacuum ( $10^{-9}$  mbar). Scanning electron microscopy (SEM) and energy-dispersive X-ray spectrometry (EDS) mapping images were conducted on SU8020 scanning electron microscope operated at an acceleration voltage of 8 kV. Atomic force microscopy (AFM) images were measured by MultiMode 8-HR (Bruker) atomic force microscope. A Rigaku D/Max-B X-ray diffractometer with Bragg-Brentano parafocusing geometry was employed to test X-ray diffraction (XRD) patterns. The ultraviolet-visible (UV-vis) spectra were conducted using a SHIMADZU, UV-2600 spectrophotometer. The steady-state photoluminescence (PL) and time-resolved photoluminescence (TRPL) spectra were recorded by an Edinburgh instruments FLS920 spectrometer (Edinburgh Instruments Ltd.). The current density-voltage ( $J-V$ ) curves of the devices were

measured with a Keithley model 2400 source meter (Abet Solar Simulator Sun2000), equipped with a light source ( $100 \text{ mW cm}^{-2}$ ) under AM 1.5 G filter. The active area of the device and the area of the shadow mask are  $0.04 \text{ cm}^2$ . The forward scan range is from 0 V to 1.2 V and the reverse scan range is from 1.2 V to 0 V, with 20 mV for each step. The scan rate is  $200 \text{ mV s}^{-1}$  and the delay time is 30 ms. External quantum efficiency (EQE) values were measured under monochromatic illumination (Oriel Cornerstone 260 1/4 m monochromator equipped with an Oriel 70613NS QTH lamp), and the calibration of the incident light was performed using a monocrystalline silicon diode. Electrical impedance spectroscopy (EIS) of the devices was performed in a frequency range from 1 MHz to 10 mHz using Zahner electrochemical workstation at an applied bias equivalent to the open-circuit voltage of the cell under 1 sun illumination. The trap density of states was deduced from the angular frequency dependent capacitance. The currents were measured under  $100 \text{ mW cm}^{-2}$  simulated AM 1.5 G irradiation (Abet5 Solar Simulator Sun2000).

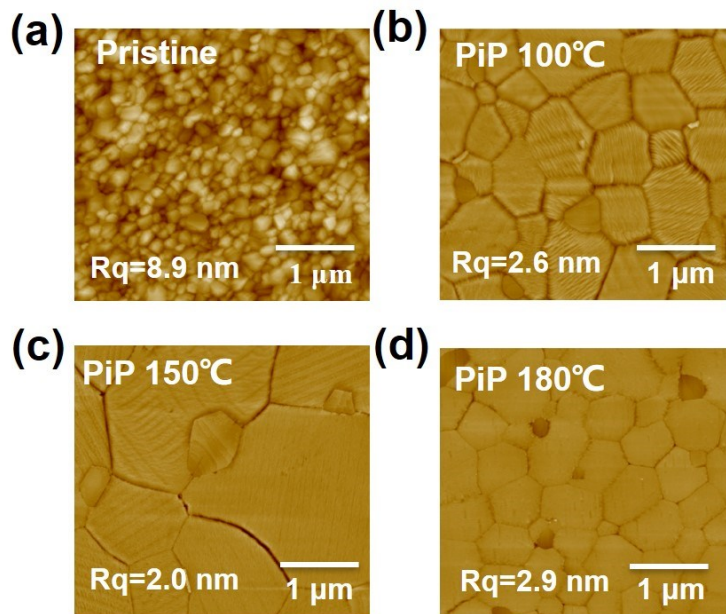

**Figure S1.** AFM height images of (a) the pristine, (b) PiP 100°C, (c) PiP 150°C and (d) PiP 180°C perovskite film.

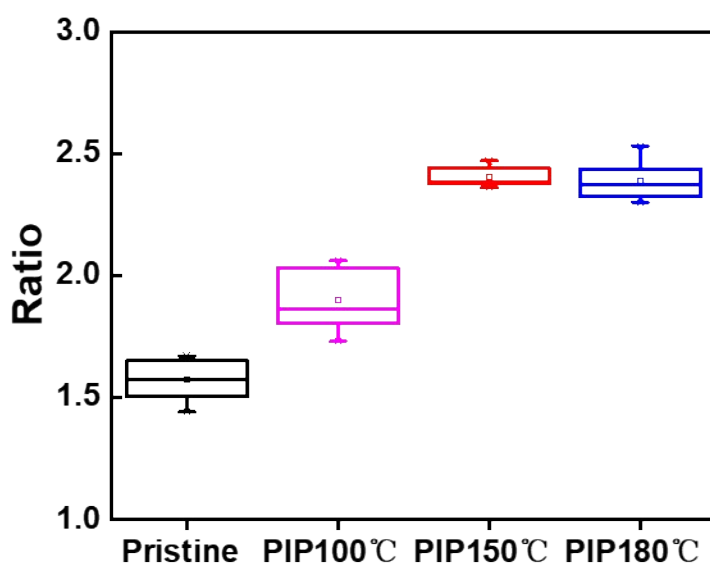

**Figure S2.** The distribution histogram of XRD patterns from different batches are exhibited (with temperature of 100°C, 150°C, 180°C, respectively).

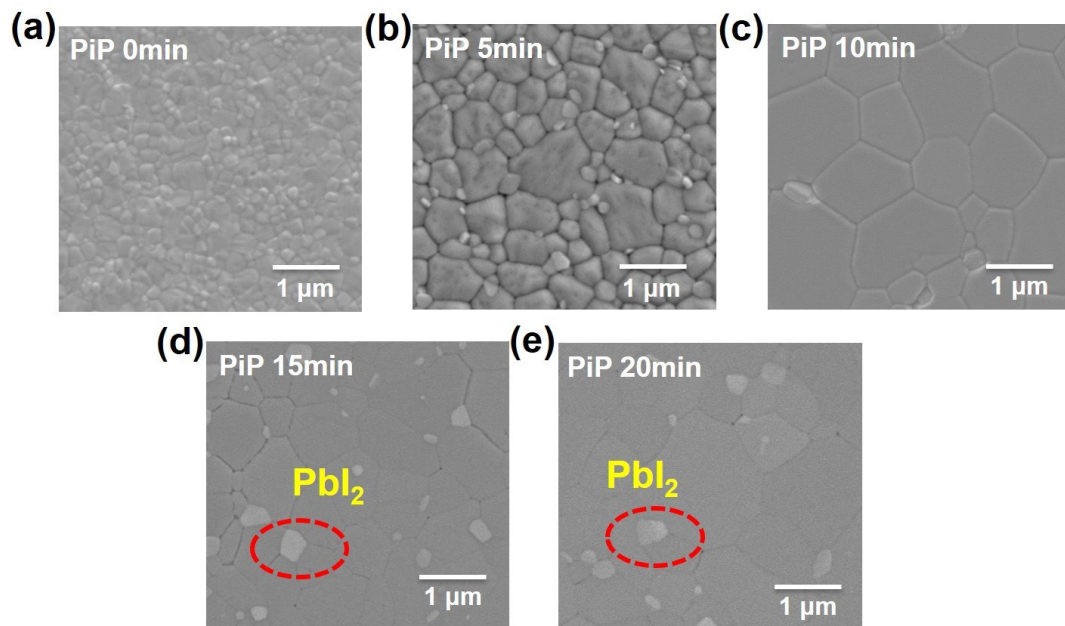

**Figure S3.** The growth process of perovskite grain in the PiP process with different PiP time (0 min, 5 min, 10 min, 15 min, 20min) under 150°C. PbI<sub>2</sub> accumulation layers are indicated by circles.

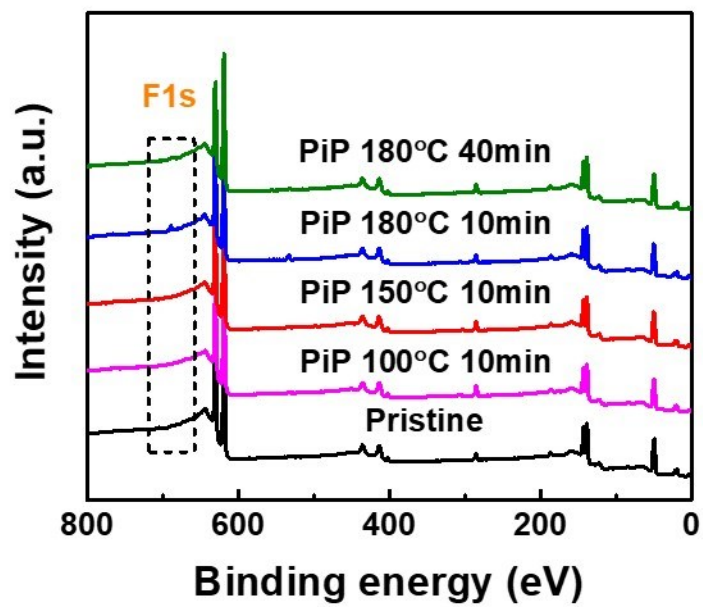

**Figure S4.** XPS spectra of perovskite film with different PiP time and PiP temperature.

Density function theory calculation were performed by using the CP2K package.<sup>1</sup> PBE functional<sup>2</sup> with Grimme D3 correction<sup>3</sup> was used to describe the system. Unrestricted Kohn-Sham DFT has been used as the electronic structure method in the framework of the Gaussian and plane waves method.<sup>4, 5</sup> The Goedecker-Teter-Hutter (GTH) pseudopotentials,<sup>6,7</sup> DZVPMOLOPT-GTH basis sets<sup>4</sup> were utilized to describe the molecules. A plane-wave energy cut-off of 500 Ry has been employed.

The adsorption energies of molecule is about -0.70 eV when vertically adsorbed on the surface and about -1.07 eV when parallelly adsorbed.

The charge density difference is defined as

$$\Delta \rho = \rho_{mol/sur} - \rho_{mol} - \rho_{sur} \quad (1)$$

Where  $\rho_{mol/sur}$ ,  $\rho_{mol}$  and  $\rho_{sur}$  are the electron density of the molecule adsorbed on surface, and the individual electron density of molecule and surface.

The binding energy is defined as

$$E_b = E_{mol/sur} - E_{mol} - E_{sur} \quad (2)$$

Where  $E_{mol/sur}$ ,  $E_{mol}$  and  $E_{sur}$  are the energies of the molecule adsorbed on surface, and the individual electron density of molecule and surface.

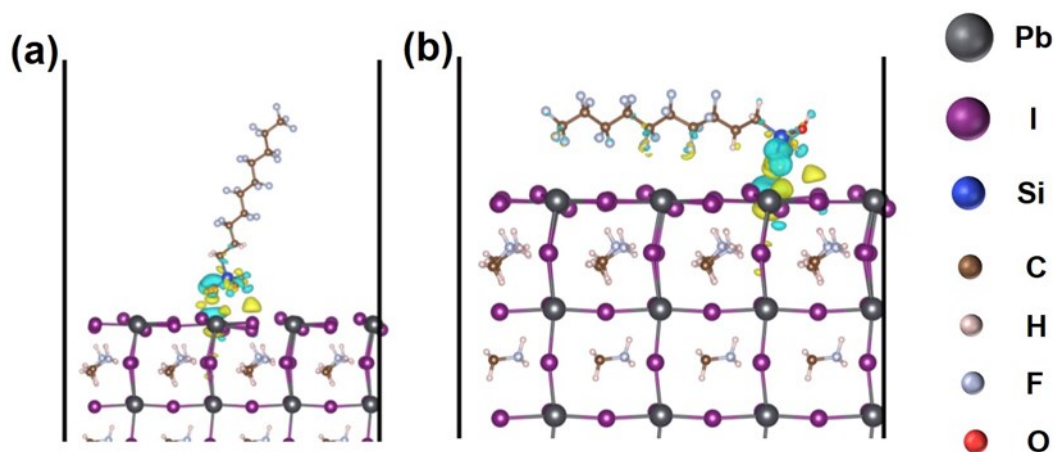

**Figure S5.** Charge difference analysis between molecule and MAPbI<sub>3</sub>. Isovalue = 0.001 a.u.





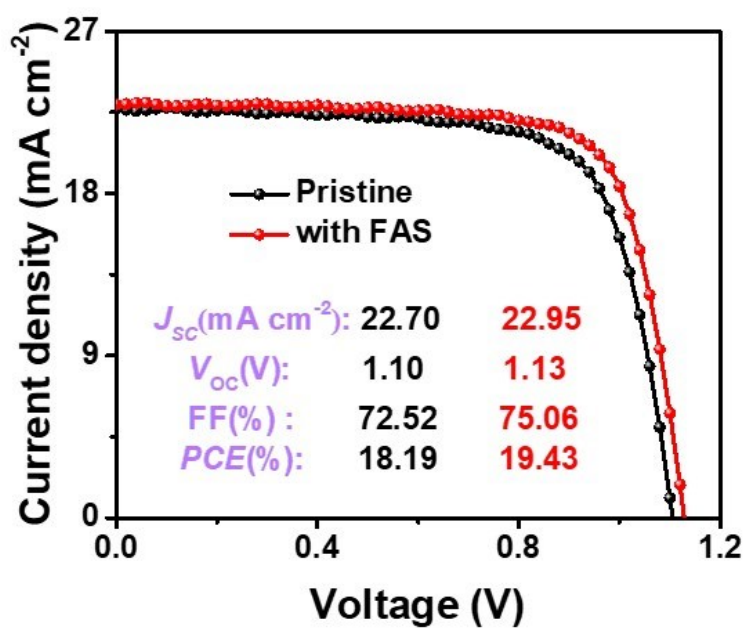

**Figure S6.** The current density–voltage ( $J$ – $V$ ) curves of devices based on pristine and modified film with FAS.

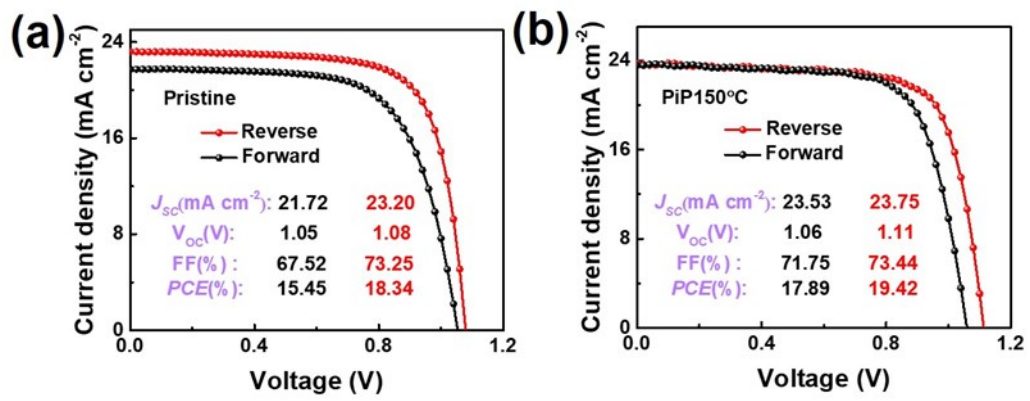

**Figure S7.** Typical  $J$ - $V$  curves of (a) pristine and (b) PiP 150°C devices under reverse and forward scans.

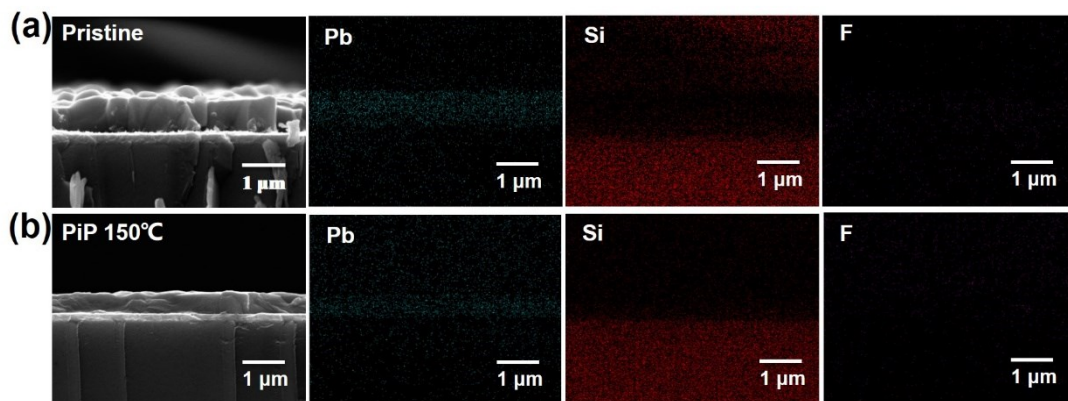

**Figure S8.** Cross-SEM-EDS mappings of Pb, F, and Si for the (a) Pristine and (b) PiP 150°C film onto ITO.

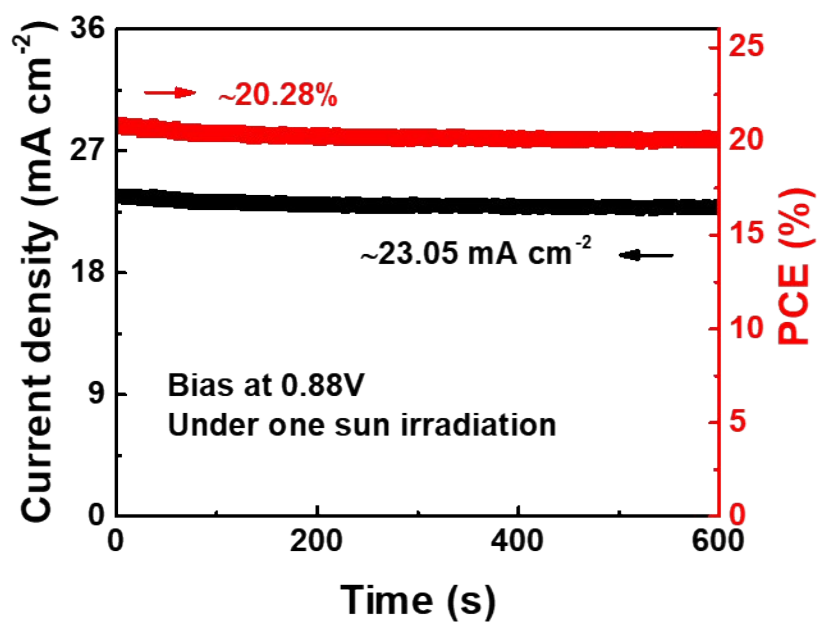

**Figure S9.** The steady-state photocurrent and output PCE of PiP 150°C device at the maximum power point of 0.88V.

**Table S1.** F content of perovskite film with different PiP temperature and PiP time.

| Temperature (°C) | Time (min) | F (%) |
|------------------|------------|-------|
| 100              | 10         | 0.21  |
| 150              | 10         | 1.04  |
| 180              | 10         | 6.03  |
| 150              | 40         | 2.49  |

**Table S2.** A comparison of PSCs based on modified MAPbI<sub>3</sub> with different pressure conditions.

| Device structure                                                           | Template type          | $V_{oc}$ (V) | $J_{sc}$ (mA cm <sup>-2</sup> ) | FF (%)       | PCE (%)      | Ref.             |
|----------------------------------------------------------------------------|------------------------|--------------|---------------------------------|--------------|--------------|------------------|
| FTO/TiO <sub>2</sub> /MAPbI <sub>3</sub> /spiro-MeOTAD/Ag                  | PUA stamp              | 1.05         | 23.24                           | 78.27        | 19.16        | 8                |
| FTO/TiO <sub>2</sub> /MAPbI <sub>3</sub> /spiro-MeOTAD/Au                  | DVD stamp              | 1.11         | 23.11                           | 76.75        | 19.71        | 9                |
| ITO/PEDOT:PSS/MAPbI <sub>3</sub> /PC <sub>71</sub> BM/C <sub>60</sub> /BCP | Hot isostatic pressing | 0.67         | 18.90                           | 67           | 11.80        | 10               |
| FTO/TiO <sub>2</sub> /MAPbI <sub>3</sub> /spiro-MeOTAD/Ag                  | Flat stamp             | 0.96         | 22.51                           | 0.742        | 16.07        | 11               |
| <b>iTO/SnO<sub>2</sub>/MAPbI<sub>3</sub>/spiro-MeOTAD/Ag</b>               | <b>Flat stamp</b>      | <b>1.13</b>  | <b>23.57</b>                    | <b>77.19</b> | <b>20.52</b> | <b>This work</b> |

## REFERENCES

1. J. Hutter, M. Iannuzzi, F. Schiffmann, J. VandeVondele, *WIREs Comput. Mol. Sci.* 2014, **4**, 15-25.
2. J. P Perdew, K. Burke, and M. Ernzerhof. *Physical review letters* 1996, **77**, 3865-3868.
3. S. Grimme, *J Comput Chem* 2006, **27**, 1787-1799.
4. J. VandeVondele, J. Hutter, *J. Chem. Phys* 2007, **127**, 114105.
5. J. VandeVondele, M. Krack, F. Mohamed, M. Parrinello, T. Chassaing, J. Hutter, *Computer Physics Communications* 2005, **167**, 103-128.
6. S. Goedecker, M Teter, and Jürg Hutter. *Physical Review B* 1996, **54**, 1703-1710.
7. C Hartwigsen, Sephen Goedecker, and Jürg Hutter. *Physical Review B* 1998, **58**, 3641-3662.
8. W. Kim, M. S. Jung, S. Lee, Y. J. Choi, J. K. Kim, S. U. Chai, W. Kim, D.-G. Choi, H. Ahn, J. H. Cho, D. Choi, H. Shin, D. Kim, J. H. Park, *Adv. Energy Mater.* 2018, **8**, 1702369.
9. Y. Wang, P. Wang, X. Zhou, C. Li, H. Li, X. Hu, F. Li, X. Liu, M. Li, Y. Song, *Adv. Energy Mater.* 2018, **8**, 1702960.
10. T. Matsushima, T. Fujihara, C. Qin, S. Terakawa, Y. Esaki, S. Hwang, A. S. D. Sandanayaka, W. J. Potscavage, C. Adachi, *J. Mater. Chem. A* 2015, **3**, 17780-17787.
11. J. Xiao, Y. Yang, X. Xu, J. Shi, L. Zhu, S. Lv, H. Wu, Y. Luo, D. Li, Q. Meng, *J. Mater. Chem. A* 2015, **3**, 5289-5293.
